# Supplementary material for: Mediating Lithium Plating/Stripping by Constructing 3D Au@Cu Pentagonal Pyramid Array
Source: MDPI journal article supplement (doi:10.3390/batteries9050279), 2023-05-19
Supplement: s1 [file s1]

## Supplementary File

### Mediating Lithium Plating/Stripping by Constructing 3D Au@Cu Pentagonal Pyramid Array

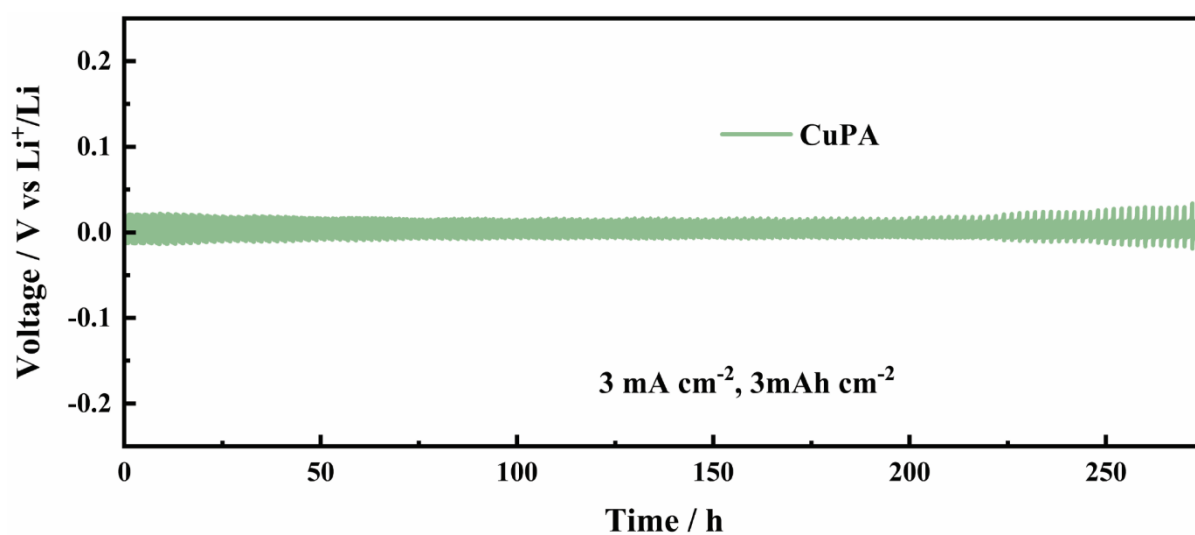

**Figure S1.** Voltage–time curves of CuPA in symmetric cells under 3 mA cm<sup>-2</sup>, 3 mAh cm<sup>-2</sup>.

The CuPA-based electrode exhibits a stable cycle of 275 h at 3 mAh cm<sup>-2</sup>, 3 mA cm<sup>-2</sup>.

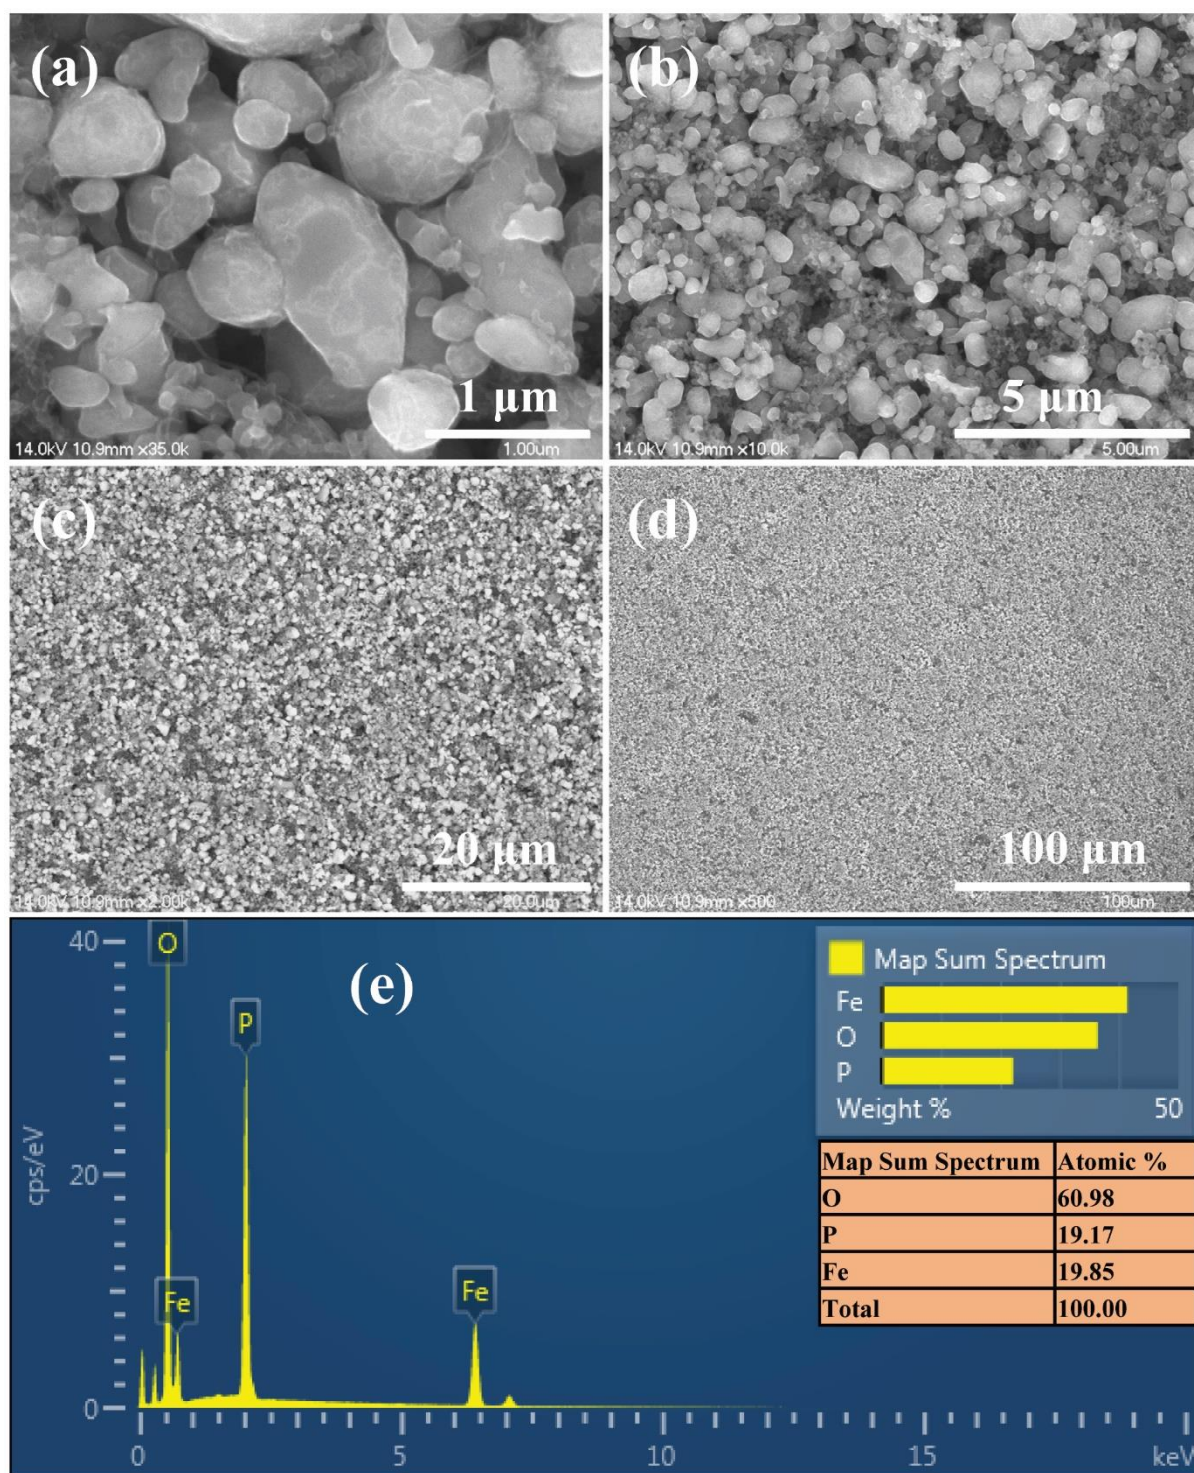

**Figure S2.** The SEM images (a–d) and EDX spectrum (e) of the  $\text{LiFePO}_4$  electrode under different magnifications.

**Table S1.** Comparison of electrochemical performances of different LMAs in full cells with LFP

| Anodes                                                        | Mass load<br>(mg cm <sup>-2</sup> ) | N/P ratio<br>(anode : cathode) | Cycle number<br>(n) | Ref. |
|---------------------------------------------------------------|-------------------------------------|--------------------------------|---------------------|------|
| Ni nano-cone @ Al                                             | 1.4                                 | 8.4                            | 110                 | [1]  |
| MXene @ Au host                                               | 1                                   | 29                             | 200                 | [2]  |
| CuO nanowire arrays/Cu                                        | 2                                   | 5.8                            | 150                 | [3]  |
| Cu(f) @ Sb                                                    | 3                                   | 7.85                           | 160                 | [4]  |
| Cu nanowire @ poly (1,3,5-triethynylbenzene) (PTEB) nanofiber | 2                                   | 14.7                           | 100                 | [5]  |
| CuO nanofilm-covered Cu microcones @ Cu foil                  | 1.3                                 | 9                              | 100                 | [6]  |
| Au@CuPPA (This work)                                          | 3                                   | 5.8                            | 150                 |      |

The mass loading of the LFP cathode and the N:P ratio affect the electrochemical performance of the full cells. Generally speaking, an excessively large N:P ratio means that the capacity of the anode is too large, which may lead to good electrochemical performance but is contrary to industry standards (the N:P ratio of commercial batteries is generally about 1.06–1.10). In this manuscript, we used LFP with a mass loading of 3 mg cm<sup>-2</sup> (capacity density of 0.51 mAh g<sup>-1</sup>) as a cathode. The N:P ratio is 5:8 in this work, which is very relatively close to the industry standard compared to previous publications, as shown in Table S1. Meanwhile, the proposed anode exhibits relatively good cycling performance at the lowest N:P ratio.

## Reference:

- [1] Hu W., Rao Y., Chen P., Ju S., Ling H., Wu Y., Momma T., Li M. Nano–Cone Structured Lithiophilic Ni Film on Cu Current Collector Facilitates Li<sup>+</sup> Ion Diffusion Toward Uniform Lithium Deposition *Advanced Materials Interfaces* 351 9 (15) 2022: pp. <https://doi.org/10.1002/admi.202200129>
- [2] Qian Y., Wei C., Tian Y., Xi B., Xiong S., Feng J., Qian Y. Constructing ultrafine lithiophilic layer on MXene paper by sputtering for stable and flexible 3D lithium metal anode *Chemical Engineering Journal* 421 2021: pp. <https://doi.org/10.1016/j.cej.2021.129685>
- [3] Cao J., Deng L., Wang X., Li W., Xie Y., Zhang J., Cheng S. Stable Lithium Metal Anode Achieved by In Situ Grown CuO Nanowire Arrays on Cu Foam *Energy & Fuels* 34 (6) 2020: pp. 7684–7691. <https://doi.org/10.1021/acs.energyfuels.0c01180>
- [4] Wang J–r., Wang M–m., He X–d., Wang S., Dong J–m., Chen F., Yasmin A., Chen C–h. A Lithiophilic 3D Conductive Skeleton for High Performance Li Metal Battery *ACS Applied Energy Materials* 3 (8) 2020: pp. 7265–7271. <https://doi.org/10.1021/acsaem.0c00055>
- [5] Yang S., Xiao R., Zhang T., Li Y., Zhong B., Wu Z., Guo X. Cu nanowires modified with carbon–rich conjugated framework PTEB for stabilizing lithium metal anodes *Chem Commun* 57 (99) 2021: pp. 13606–13609. <https://doi.org/10.1039/d1cc04822h>
- [6] Hu W., Yao Y., Huang X., Ju S., Chen Z., Li M., Wu Y. CuO Nanofilm–Covered Cu Microcone Coating for a Long Cycle Li Metal Anode by In Situ Formed Li<sub>2</sub>O *ACS Applied Energy Materials* 5 (3) 2022: pp. 3773–3782. <https://doi.org/10.1021/acsaem.2c00218>
